# Supplementary material for: Bio-inspired fabrication of silver nanoparticles on nanostructured silica: characterization and application as a highly efficient hydrogenation catalyst
Source: Royal Society of Chemistry journal article supplement (doi:10.1039/c3gc40310f), 2013-01-01
Supplement: c3gc40310f.pdf [file c3gc40310f.pdf]

SUPPORTING INFORMATION

# Bio-inspired Fabrication of Silver Nanoparticles on Nanostructure Silica, Characterization and Application as Highly Efficient Hydrogenation Catalyst

Sujoy K. Das,<sup>\*a</sup> Md. Motiar R. Khan,<sup>b,c</sup> Arun K. Guha,<sup>b</sup> and Nityananda Naskar<sup>d</sup>

<sup>a</sup>Environmental Technology Division, Council of Scientific and Industrial Research (CSIR)-Central Leather Research Institute (CLRI), Chennai – 600 020, India, <sup>b</sup>Department of Biological Chemistry, and <sup>d</sup>Polymer Science Unit, Indian Association for the Cultivation of Science, Kolkata – 700 032, India

<sup>c</sup>Present address: Department of Food Technology and Biochemical Engineering, Jadavpur University, Kolkata – 700 032, India

**Table S1:** Physical and chemical properties of nanosilica

|                      |                                   |
|----------------------|-----------------------------------|
| Form                 | Powder                            |
| Colour               | Light Cream                       |
| Odour                | Soapy                             |
| Melting point        | >390 °C                           |
| Ignition temperature | 470 °C                            |
| Glow temperature     | >450 °C                           |
| Bulk density         | 400-650 g.L <sup>-1</sup>         |
| Water solubility     | ~0.032 g.L <sup>-1</sup> at 20 °C |

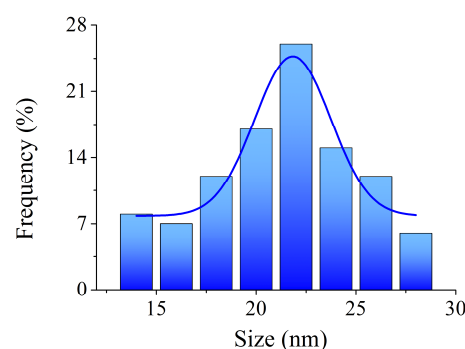

**Figure S1.** Particle size histogram of AgNPs on Ag@Nanosilica.

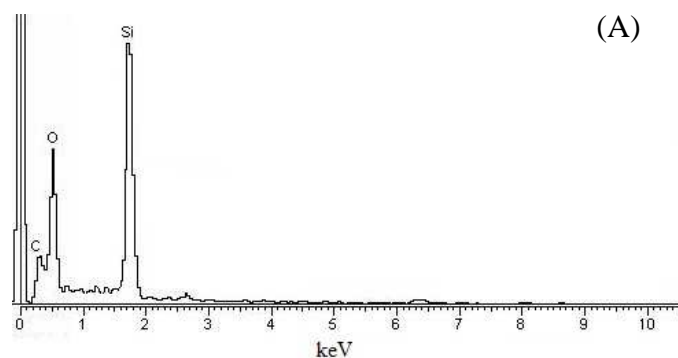

(A)

| Element | Weight% | Atomic% |
|---------|---------|---------|
| C K     | 11.31   | 14.90   |
| O K     | 49.11   | 48.16   |
| Si K    | 39.58   | 36.94   |
| Totals  | 100.00  |         |

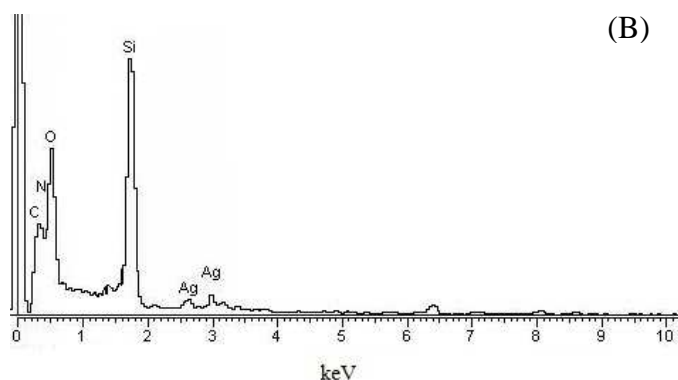

(B)

| Element | Weight% | Atomic% |
|---------|---------|---------|
| C K     | 19.83   | 31.68   |
| N K     | 17.79   | 26.89   |
| O K     | 30.36   | 29.44   |
| Si K    | 28.57   | 11.48   |
| Ag L    | 3.66    | 0.51    |
| Totals  | 100.00  |         |

**Figure S2.** EDXA spectrum (left panel) and quantitative elemental analysis (right panel) of (A) nanosilica and (B) Ag@Nanosilica.

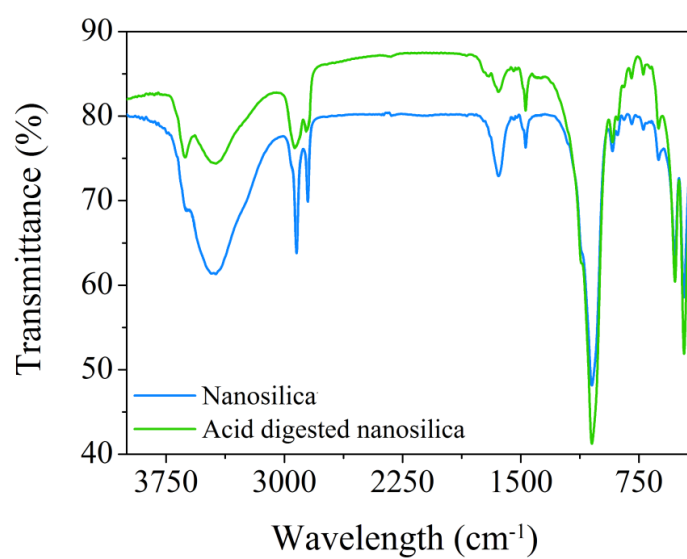

**Figure S3:** FTIR spectra of the pristine and acid digested nanosilica.

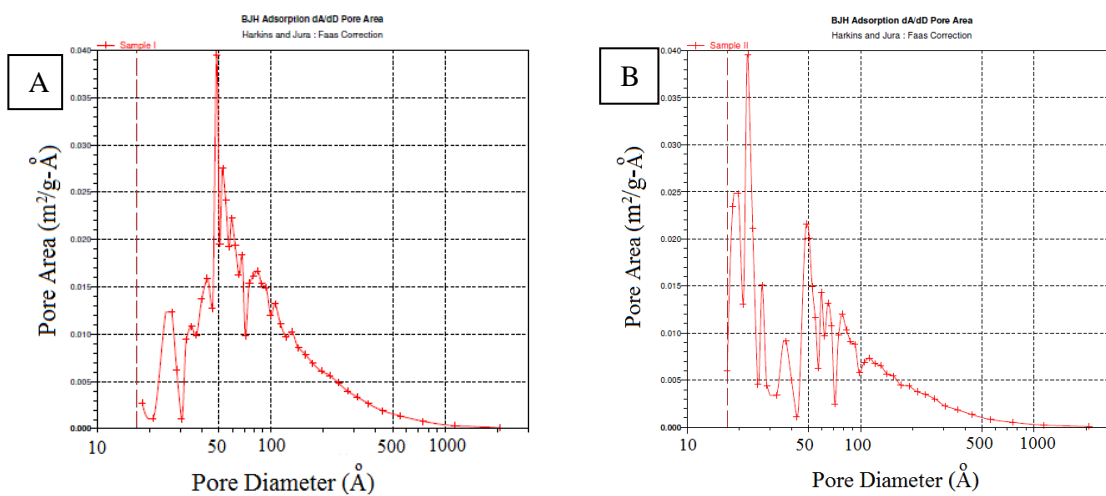

**Figure S4.** Pore size distribution of (A) nanosilica and (B) Ag@Nanosilica
